# Supplementary material for: Resolving the effects of 2-D versus 3-D grain measurements on apatite (U–Th) ∕ He age data and reproducibility
Source: Copernicus journal article supplement (doi:10.5194/gchron-1-17-2019), 2019-09-26
Supplement: Supplementary file 1 [file gchron-1-17-2019-supplement.zip]

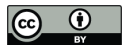

## *Supplement of*

# **Resolving the effects of 2-D versus 3-D grain measurements on apatite (U–Th) / He age data and reproducibility**

**Emily H. G. Cooperdock et al.**

*Correspondence to:* Emily H. G. Cooperdock ([cooperdo@usc.edu](mailto:cooperdo@usc.edu))

- [gchron-1-17-2019-supplement-title-page.pdf](#)
- [97BS-CR8C.mp4](#)

The copyright of individual parts of the supplement might differ from the CC BY 4.0 License.
